# Supplementary material
Source: MDPI journal article supplement (https://www.mdpi.com/2072-4292/15/14/3604)
Supplement: s1 [file s1]

# The Spatio-Temporal Changes of Small Lakes of the Qilian Mountains from 1987 to 2020 and Their Driving Mechanisms

Chao Li <sup>1,2</sup>, Shiqiang Zhang <sup>1,2,\*</sup>, Rensheng Chen <sup>1,3</sup>, Dahong Zhang <sup>1,2</sup>, Gang Zhou <sup>1,2</sup>, Wen Li <sup>1,2</sup> and Tianxing Rao <sup>1,2</sup>

<sup>1</sup> College of Urban and Environmental Science, Northwest University, Xi'an 710127, China; 202110257@stumail.nwu.edu.cn (C.L.)

<sup>2</sup> Shaanxi Key Laboratory of Earth Surface System and Environmental Carrying Capacity, Northwest University, Xi'an 710127, China

<sup>3</sup> Qilian Alpine Ecology and Hydrology Research Station, Northwest Institute of Eco-Environment and Resources, Chinese Academy of Sciences, Lanzhou 730000, China

\* Correspondence: zhangsq@nwu.edu.cn

## Contents of this file

Figure S1 to S4

Table S1

Figure S1: Spatial distribution of nine factors of water body change in small lakes.

Figure S2: Spatial trends of the nine factors of water body change in small lakes.

Figure S3: Relationships between MLWA and the nine factors in the QMR.

Figure S4: Temporal trends of the nine factors of SLWB change in the QMR from 1987 to 2020.

Table S1: Suitable ranges of the driving factors in the different subregions (95% confidence level).

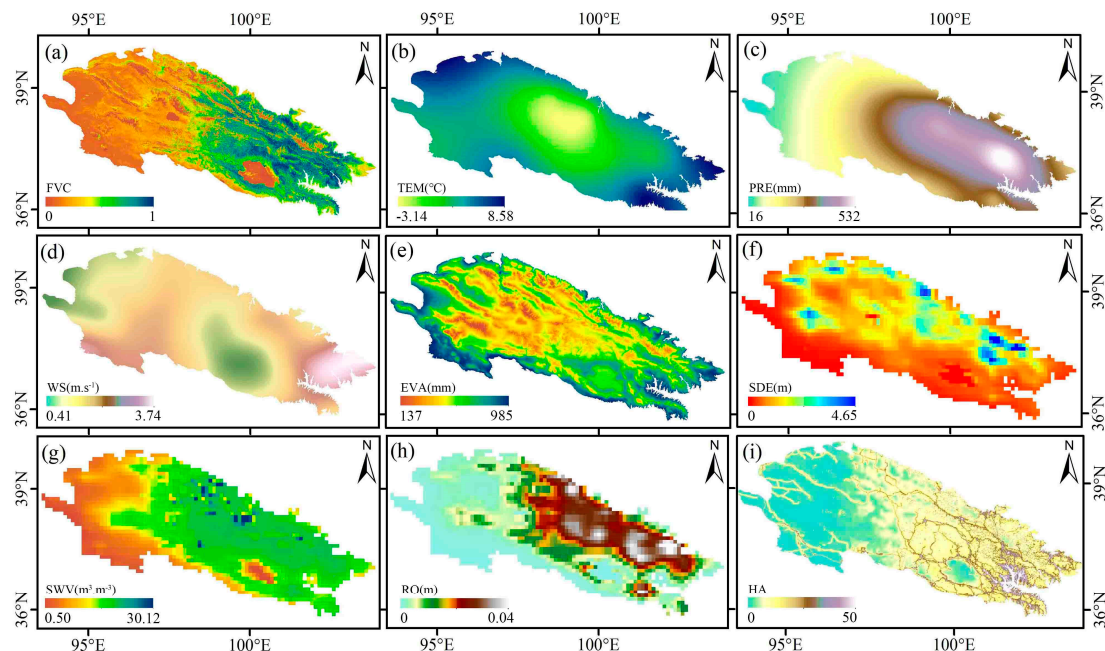

Figure S1. Spatial distribution of nine factors of water body change in small lakes.

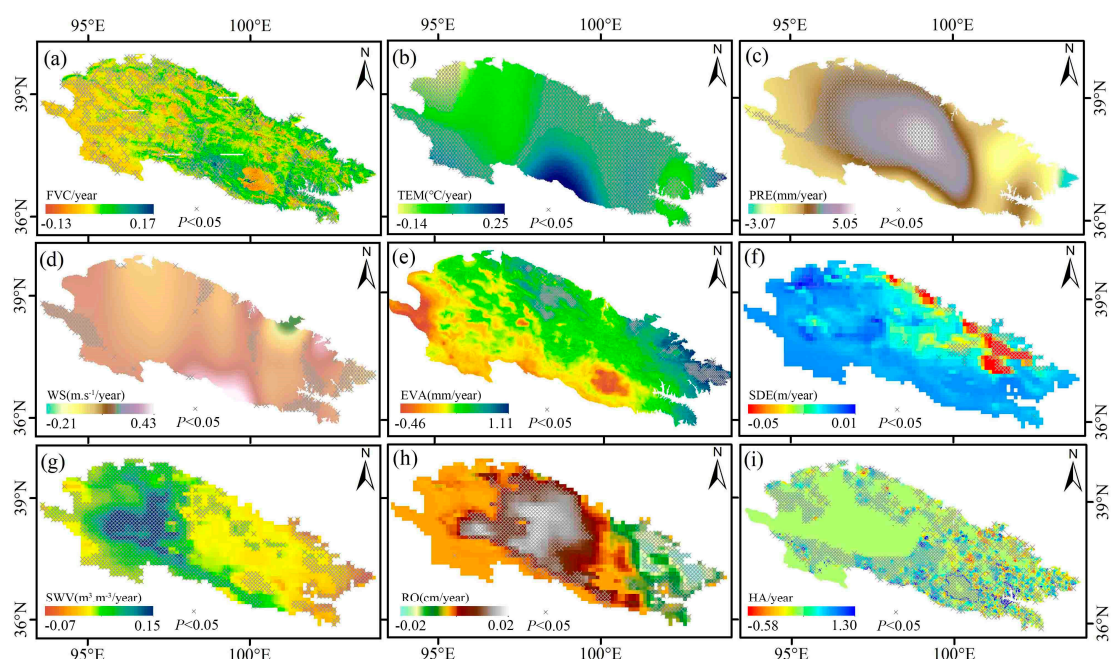

**Figure S2.** Spatial trends of the nine factors of water body change in small lakes.

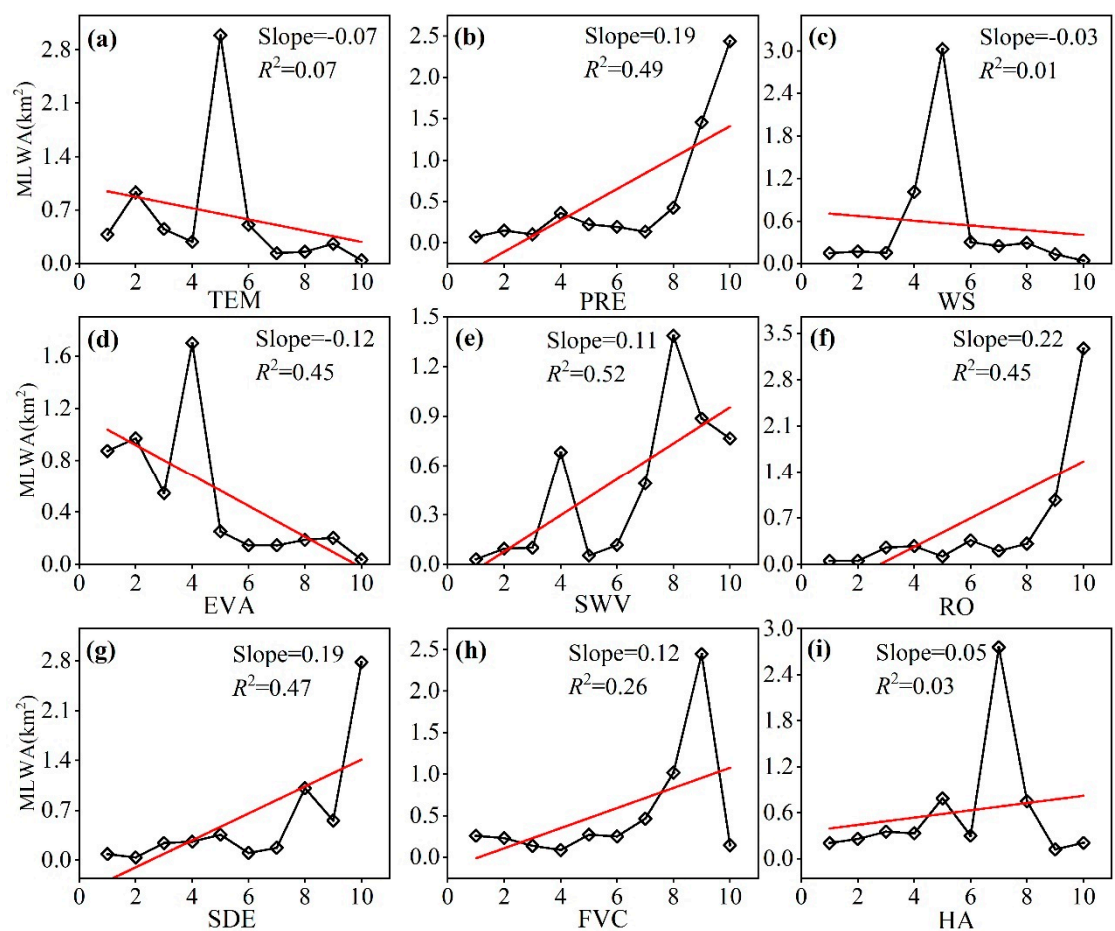

**Figure S3.** Relationships between MLWA and the nine factors in the QMR.

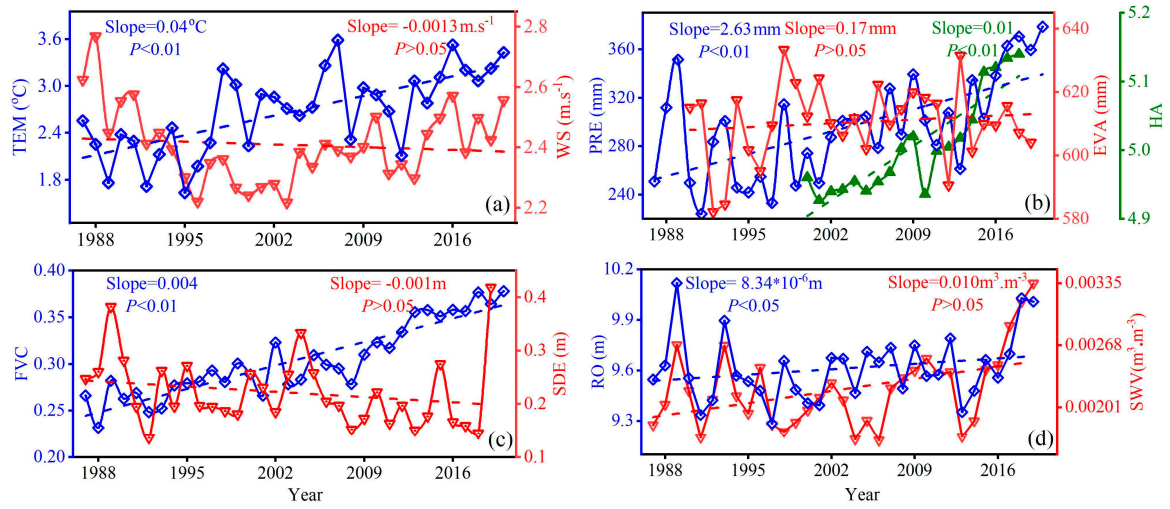

**Figure S4.** Temporal trends of the nine factors of SLWB change in the QMR from 1987 to 2020.

**Table S1.** Suitable ranges of the driving factors in the different subregions (95% confidence level).

| Basin | Factor                              | Suitable scope | MLWA (km <sup>2</sup> ) | Basin | Factor                              | Suitable scope | MLWA (km <sup>2</sup> ) |
|-------|-------------------------------------|----------------|-------------------------|-------|-------------------------------------|----------------|-------------------------|
| BHB   | TEM/°C                              | -0.22–0.89     | 0.80                    | DSB   | TEM/°C                              | -1.76–0.68     | 1.01                    |
|       | PRE/mm                              | 340–399        | 0.74                    |       | PRE/mm                              | 248–320        | 1.02                    |
|       | WS/m.s <sup>-1</sup>                | 1.88–1.96      | 0.51                    |       | WS/m.s <sup>-1</sup>                | 1.92–2.02      | 0.63                    |
|       | EVA/mm                              | 542–556        | 0.66                    |       | EVA/mm                              | 345–399        | 1.56                    |
|       | SWV/m <sup>3</sup> .m <sup>-3</sup> | 17.1–18.0      | 0.15                    |       | SWV/m <sup>3</sup> .m <sup>-3</sup> | 14.06–15.89    | 0.47                    |
|       | RO/m                                | 0.02–0.03      | 0.91                    |       | RO/m                                | 0.007–0.014    | 1.93                    |
|       | SDE/m                               | 1.03–1.12      | 0.78                    |       | SDE/m                               | 1.07–1.29      | 0.60                    |
|       | FVC                                 | 0.43–0.47      | 0.89                    |       | FVC                                 | 0.15–0.17      | 0.54                    |
| HBB   | HA                                  | 5.29–5.91      | 0.15                    | HLB   | HA                                  | 1.93–2.94      | 0.60                    |
|       | TEM/°C                              | 2.15–2.68      | 3.55                    |       | TEM/°C                              | -0.21– -0.17   | 5.69                    |
|       | PRE/mm                              | 232–276        | 3.56                    |       | PRE/mm                              | 286–302        | 5.68                    |
|       | WS/m.s <sup>-1</sup>                | 1.87–1.94      | 3.82                    |       | WS/m.s <sup>-1</sup>                | 1.80–1.85      | 4.39                    |
|       | EVA/mm                              | 424–471        | 4.12                    |       | EVA/mm                              | 386–414        | 5.65                    |
|       | SWV/m <sup>3</sup> .m <sup>-3</sup> | 11.58–13.87    | 3.28                    |       | SWV/m <sup>3</sup> .m <sup>-3</sup> | 14.76–15.66    | 5.66                    |
|       | RO/m                                | 0.005–0.006    | 4.15                    |       | RO/m                                | 0.004–0.006    | 5.33                    |
|       | SDE/m                               | 0.63–0.83      | 3.92                    |       | SDE/m                               | 0.66–0.67      | 5.67                    |
| QLB   | FVC                                 | 0.18–0.26      | 4.41                    | SDB   | FVC                                 | 0.09–0.11      | 5.67                    |
|       | HA                                  | 1.64–2.32      | 2.16                    |       | HA                                  | 2.37–2.69      | 5.68                    |
|       | TEM/°C                              | 1.07–2.07      | 14.16                   |       | TEM/°C                              | 4.47–4.78      | 0.65                    |
|       | PRE/mm                              | 47–520         | 8.45                    |       | PRE/mm                              | 362–391        | 0.68                    |
|       | WS/m.s <sup>-1</sup>                | 1.85–1.94      | 11.12                   |       | WS/m.s <sup>-1</sup>                | 0.74–0.79      | 0.70                    |
|       | EVA/mm                              | 607–642        | 7.82                    |       | EVA/mm                              | 590–617        | 0.46                    |
|       | SWV/m <sup>3</sup> .m <sup>-3</sup> | 17.3–17.8      | 5.51                    |       | SWV/m <sup>3</sup> .m <sup>-3</sup> | 18.0–18.2      | 0.50                    |
|       | RO/m                                | 0.026–0.031    | 11.43                   |       | RO/m                                | 0.02–0.03      | 0.70                    |
|       | SDE/m                               | 1.46–2.28      | 13.54                   |       | SDE/m                               | 0.89–1.56      | 0.70                    |
|       | FVC                                 | 0.61–0.65      | 7.68                    |       | FVC                                 | 0.28–0.30      | 0.59                    |
|       | HA                                  | 9.73–11.29     | 10.46                   |       | HA                                  | 8.51–9.40      | 0.56                    |
